## RETRACTION

# Retraction: Potential of Landsat 8 OLI for mapping and monitoring of soil salinity in an arid region: A case study in Dushak, Turkmenistan

The *PLOS ONE* Editors

The *PLOS ONE* Editors retract this article [1] because it was identified as one of a series of submissions for which we have concerns about authorship, competing interests, and peer review. We regret that the issues were not addressed prior to the article's publication.

EG, OMK, and MJA did not agree with the retraction. XW, MBudak, SAO, and MBrestic either did not respond directly or could not be reached.

## Reference

1. Günal E, Wang X, Kılıc OM, Budak M, Al Obaid S, Ansari MJ, et al. (2021) Potential of Landsat 8 OLI for mapping and monitoring of soil salinity in an arid region: A case study in Dushak, Turkmenistan. *PLoS ONE* 16(11): e0259695. <https://doi.org/10.1371/journal.pone.0259695> PMID: 34780515

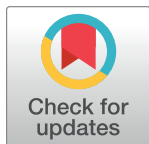

## OPEN ACCESS

**Citation:** The *PLOS ONE* Editors (2022) Retraction: Potential of Landsat 8 OLI for mapping and monitoring of soil salinity in an arid region: A case study in Dushak, Turkmenistan. *PLoS ONE* 17(8): e0272493. <https://doi.org/10.1371/journal.pone.0272493>

**Published:** August 17, 2022

**Copyright:** © 2022 The PLOS ONE Editors. This is an open access article distributed under the terms of the [Creative Commons Attribution License](https://creativecommons.org/licenses/by/4.0/), which permits unrestricted use, distribution, and reproduction in any medium, provided the original author and source are credited.
